# **Abundant and rare bacterial taxa structuring differently in sediment and water in thermokarst lakes in the Yellow River Source area, Qinghai-Tibet Plateau**

Ze Ren<sup>1,2#</sup>, Cheng Zhang<sup>1,3#</sup>, Xia Li<sup>1,2\*</sup>, Kang Ma<sup>2</sup>, Kexin Feng<sup>4</sup>, Zhe Zhang<sup>4</sup>, Baoshan Cui<sup>1,2\*</sup>

1 Advanced Institute of Natural Sciences, Beijing Normal University, Zhuhai 519087, China

2 School of Environment, Beijing Normal University, Beijing 100875, China

3 School of Engineering Technology, Beijing Normal University, Zhuhai 519087, China

4 College of Arts and Sciences, Beijing Normal University, Zhuhai 519087, China

**#Authors contributed equally**

**\*Corresponding Author:**

Xia Li, [lixiabnu@bnu.edu.cn](mailto:lixiabnu@bnu.edu.cn), Advanced Institute of Natural Sciences, Beijing Normal University, Zhuhai 519087, China

Baoshan Cui, [cuibs@bnu.edu.cn](mailto:cuib@bnu.edu.cn), School of Environment, Beijing Normal University, Beijing 100875, China

## Abstract

Thermokarst lakes are forming from permafrost thaw and severely affected by accelerating climate change. Sediment and water in these lakes are distinct habitats but closely connected. However, our understanding of the differences and linkages between sediment and water in thermokarst lakes remain largely unknown, especially from the perspective of bacterial community patterns and underlying mechanisms. In this study, we examined bacterial communities in sediment and water in thermokarst lakes in the Yellow River Source area, Qinghai-Tibet Plateau. Bacterial taxa were divided to abundant and rare according to their relative abundance, and the Sorensen dissimilarity ( $\beta_{\text{sor}}$ ) was partitioned into turnover ( $\beta_{\text{turn}}$ ) and nestedness ( $\beta_{\text{nest}}$ ). The results showed that the whole bacterial communities as well as the abundant and rare subcommunities differed substantially between sediment and water, in terms of taxonomical composition,  $\alpha$ -diversity, and  $\beta$ -diversity. Sediment had significantly lower  $\alpha$ -diversity indexes but higher  $\beta$ -diversity than water. Abundant taxa had significantly higher relative abundances but lower  $\alpha$ -diversity and  $\beta$ -diversity than rare taxa. Moreover, bacterial communities are predominantly governed by strong turnover processes ( $\beta_{\text{turn}}/\beta_{\text{sor}}$  ratio of 0.925). Abundant subcommunities were significantly lower in  $\beta_{\text{turn}}/\beta_{\text{sor}}$  ratio compared to rare subcommunities. Bacterial communities in sediment had a significantly higher  $\beta_{\text{turn}}/\beta_{\text{sor}}$  ratio than in water. The results suggest that the bacterial communities of thermokarst lakes, especially rare subcommunities or particularly in sediment, might be strongly structured by environmental filtering and geographical isolation, leading to compositional distinct. By revealing bacterial communities in sediment and water, this integral study increased our current knowledge of thermokarst lakes, enhancing our understanding of the community assembly rules and ecosystem structures and processes of these rapid changing and vulnerable ecosystems.

**Keywords:** thermokarst lakes, Qinghai-Tibet Plateau, species turnover, nestedness, abundant and rare taxa.

## Introduction

Permafrost is widespread in high latitude and high elevation regions, covering about one quarter of land surface in the Northern Hemisphere and experiencing severe warming than the remainder of the globe (Qiu and Cheng, 1995; Zhang et al, 1999). Thermokarst lakes are forming as a result of permafrost thaw, acting as an important and widespread aquatic ecosystems in cold regions (Kokelj and Jorgenson, 2013; Farquharson et al, 2016) with significant roles in hydrological, ecological, and biogeochemical processes (Chin et al, 2016; In'T Zandt et al, 2020; Manasyrov et al, 2021). In Arctic and sub-Arctic area, thermokarst lakes cover up to 40% of the permafrost area (de Jong et al, 2018). As an indicator of permafrost degradation, thermokarst lakes are suffering substantial changes in size and abundance owing to accelerating permafrost thaw (Karlsson et al, 2012; Pastick et al, 2019). Under accelerating climate change, the evolution process of thermokarst lakes including expansion, erosion, shrinkage, and disappearance, will be accelerated (Vincent et al, 2013; Luo et al, 2015; Biskaborn et al, 2019), resulting in significant impacts on regional environmental security and global biogeochemical processes (Luo et al, 2015). However, we are lacking of knowledge in ecosystem structure, function, and processes of thermokarst lakes compared to temperate lakes.

In lake ecosystems, bacteria play pivotal roles in ecosystem structuring and functioning. Bacterial communities exhibit high compositional and functional diversities and variabilities, with a relatively few abundant taxa coexist with considerable proportion of rare taxa (Lynch and Neufeld, 2015). In these enormously complex bacterial communities, abundant and rare taxa have fundamentally different characteristics and ecological roles (Logares et al, 2014). For example, abundant taxa contribute predominantly to biomass production and energy flow, whereas rare taxa contribute mostly to species richness and redundant functions (Pedros-Alio, 2012; Debroy et al, 2015). More and more studies have been conducted to unravel the differences between abundant and rare subcommunities in various environments, such as coastal and marine environments (Campbell et al, 2011; Logares et al, 2014), inland waters (Liu et al, 2015; Xue et al, 2018; Ren et al, 2020), and soil (Jiao and Lu, 2019; Xue et al, 2020). These studies indicated that abundant and rare subcommunities present contrasting community patterns and processes and are subject to distinct environmental factors. Assessment bacterial communities by considering abundant and rare subcommunities is also crucial for understanding the heterogeneous and fast changing thermokarst lake ecosystems.

In lake ecosystems, sediment and water are two distinct but closely interconnected environments (Carter et al, 2003; Parker et al, 2016). For example, these two environments have different chemical and physical properties but interact intimately through materials deposition from water to sediment and releasing from sediment to water (Roeske et al, 2012). These two habitats host different assemblages of microorganisms with tremendous diversity which play vital roles in maintaining and driving ecosystem structure and

processes (Lozupone and Knight, 2007; Roeske et al, 2012; Ren et al, 2019). Moreover, the variation of bacterial communities in sediment and water are driven differently by a variety of factors (Lozupone and Knight, 2007; Roeske et al, 2012; Ren et al, 2019). For thermokarst lakes, their formation (permafrost thaw) and evolution (horizontal and vertical permafrost degradation) mechanisms suggest that sediment and water have very close relationships in thermokarst lakes. Thermokarst processes stimulate the release of carbon, nutrients, and even heavy metals from deeper permafrost (sediment) to water and this releasing processes can be further accelerated by microbial activities and climate change (Bowden, 2010; In'T Zandt et al, 2020; Manasypov et al, 2021). Intensifying climate change is beginning to unlock more materials and microorganisms from sediment to water (Graham et al, 2012; Mackelprang et al, 2017). In cold region, thermokarst lakes are especially important due to their huge abundance (Polishchuk et al, 2017), massive storage of water, carbon, and nutrients (Reyes and Lougheed, 2015), as well as their enormous contributions of greenhouse gases (Walter et al, 2006; Serikova et al, 2019; In'T Zandt et al, 2020). Although immense amounts of microbial research have been conducted in thermokarst lakes, overwhelming majority of which focused on surface water (Tranvik, 1989; Shirokova et al, 2013; Vucic et al, 2020) rather than sediment or both. However, the differences and linkages between sediment and water in thermokarst lakes are remain largely unknow.

As the third pole of the world, Qinghai-Tibet Plateau is covered by permafrost up to 40% of the land area and is highly sensitive to climate change (Zou et al, 2017). The ongoing global warming has accelerated permafrost degradation, resulting in extensive changes of thermokarst lakes with lake number increase and lake area expansion (Luo et al, 2015; Zhang et al, 2017). In this study, we investigated the bacterial communities in sediment and water in thermokarst lakes of the Yellow River Source area. Our object was to reveal (1) the assemblage structure processes of abundant and rare taxa in sediment and water, (2) the responses of abundant and rare subcommunities to environmental variables, and (3) the differences and linkages between sediment and water. The integral understanding of bacterial community in both sediment and water could provide insights into community assembly rules and ecosystem structures and processes of the thermokarst lakes.

## **Methods**

### ***Study area, field sampling, and chemical analysis***

This study was conducted in the Yellow River Source area on the Qinghai-Tibet Plateau (Figure 1). In July 2020, we sampled 23 thermokarst lakes in the study area. The elevation of the studied lake surface ranged from 4200 to 4350 m. In each lake, both water samples and sediment samples were collected. Conductivity and pH of the lake water were measured *in situ* using a multiparameter instrument (YSI ProPlus, Yellow Springs, Ohio). Because the thermokarst lakes are very shallow, only surface water samples were collected at the depth of 0.3 to 0.5m. Three 1L water samples were filled in acid clean bottles and

transported to the laboratory for chemical analyses, including dissolved organic carbon (DOC), total nitrogen (TN), and total phosphorus (TP). Microbial samples were collected by filtering 200 mL water onto a 0.2  $\mu\text{m}$  polycarbonate membrane filter (Whatman, UK) and frozen in liquid nitrogen immediately in the field and stored at  $-80\text{ }^{\circ}\text{C}$  in the lab until DNA extraction. Sediment samples were collected using a Ponar Grab sampler. The top 5 cm of the sediment was collected and homogenized. Sediment microbial samples were connected in a 45 mL sterile centrifuge tube and frozen in liquid nitrogen in the field and stored at  $-80\text{ }^{\circ}\text{C}$  in the lab for DNA extraction. The remaining sediments were air-dried for the determination of chemical properties, including pH, conductivity, sediment organic carbon (SOC), TN, and TP. The basic chemical properties of sediment and water samples were summarized in Table S1.

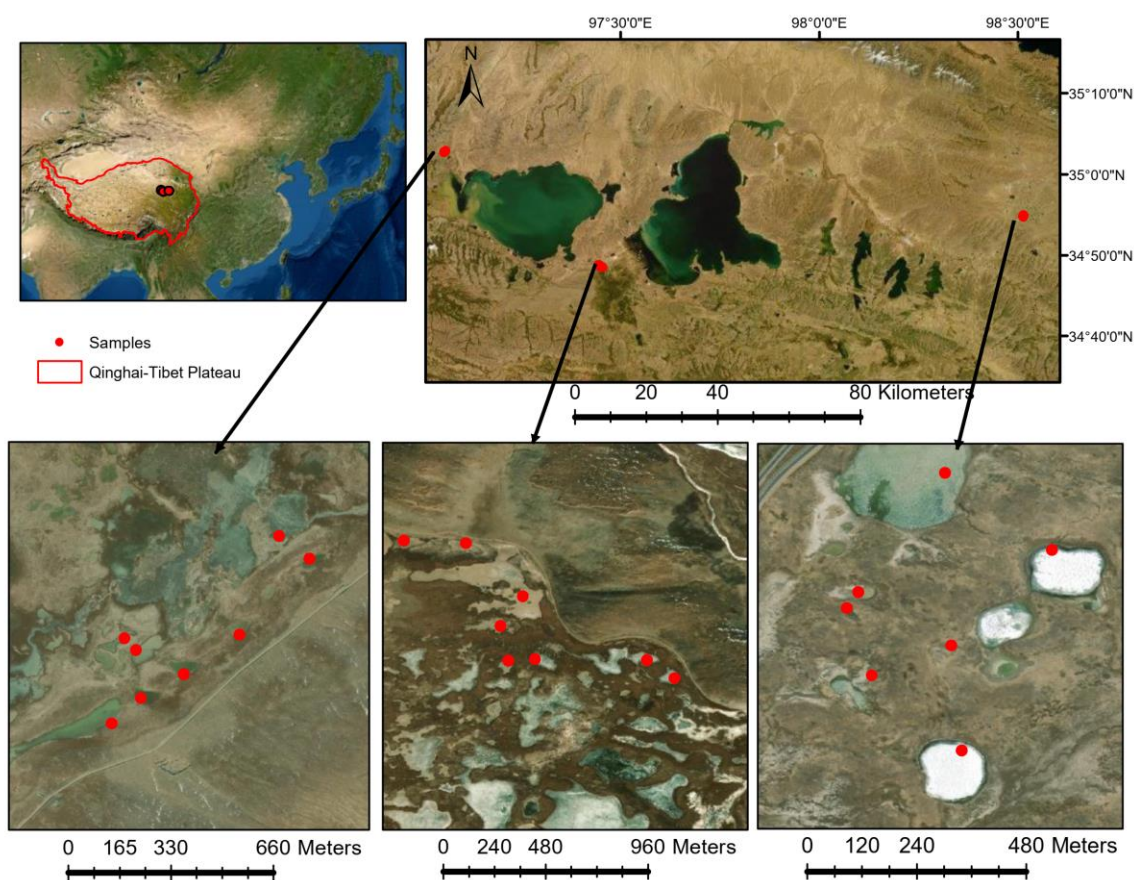

Figure 1 Water and sediment samples were collected from 23 lakes in June 2020 in the Yellow River Source area on the Qinghai-Tibet Plateau.

#### ***DNA extraction, PCR, and sequencing***

The water (filter) and sediment (0.5g) microbial samples were used to extract genomic DNA using the DNeasy PowerSoil Kit (QIAGEN, Germany) following the manufacturer's protocols. The genome DNA was used as template for PCR amplification with the barcoded primers and Tks Gflex DNA Polymerase (Takara, USA). The hypervariable V3-

V4 regions of bacterial 16S rRNA were amplified using universal primers 343F 5'-TACGGRAGGCAGCAG-3' and 798R 5'-AGGGTATCTAATCCT-3' (Nossa et al, 2010). In order to minimize amplification bias, three individual PCR amplifications were performed using the following procedure: initial denaturation at 94 °C for 5 min, 24 cycles of denaturation at 94 °C for 30 s followed by annealing at 56 °C for 30 s and extension at 72 °C for 20 s, and final extension step at 72 °C for 5 min. Amplified DNA was verified by agarose gel electrophoresis, purified using the AMPure XP beads (Beckman, USA), and quantified using Qubit dsDNA assay kit (Thermo Fisher Scientific, USA). Sequencing of the amplicon libraries was conducted on an Illumina MiSeq platform (Illumina, San Diego, CA, USA) according to manufacturer's instructions.

### *Data analyses*

Raw sequence data were preprocessed using Trimmomatic software (version 0.35) (Bolger et al, 2014) to detect and cut off ambiguous bases and low-quality sequences with average quality score below 20. After trimming, paired-end reads were assembled using FLASH software (Reyon et al, 2012). Parameters of assembly were: 10bp of minimal overlapping, 200bp of maximum overlapping and 20% of maximum mismatch rate. Sequences were performed further denoising using QIIME 1.9.1 (Caporaso et al, 2010) as follows: reads with ambiguous, homologous sequences or below 200bp were abandoned; reads with 75% of bases above Q20 were retained; reads with chimera were detected and removed. Clean reads were subjected to primer sequences removal and clustering to generate operational taxonomic units (OTUs) against the SILVA 132 database (Caporaso et al, 2010) using QIIME. To avoid the bias of surveying efforts, the sequence data were normalized at the depth of 27,890 sequence per sample (Figure S1).

Bacterial taxa were defined as abundant and rare according to their relative abundance (Pedros-Alio, 2012; Logares et al, 2014). In this study, OTUs with a relative abundance  $\geq$  0.1% of the total sequences were defined as abundant and OTUs with a relative abundance  $<$ 0.01% were defined as rare. The  $\alpha$ -diversity indices, including Chao 1, observed OTUs, Shannon, and phylogenetic diversity (PD whole tree) were calculated using QIIME 1.9.1 (Caporaso et al, 2010). To further reveal the mechanisms underlying the discrepancies observed between the abundant and rare subcommunities, as well as between bacterial communities in sediment and water, the Sorensen dissimilarity ( $\beta_{\text{sor}}$ , a  $\beta$ -diversity metric that measures compositional differences between sites) was partitioned to turnover component ( $\beta_{\text{turn}}$ ) and nestedness-resultant fraction ( $\beta_{\text{nest}}$ ) (Baselga, 2010) using the "betapart 1.5.4" package (Baselga and Orme, 2012). The differences of whole, abundant, and rare communities/sub-communities between sediment and water were revealed by principal coordinates analysis (PCoA) based on Bray-Curtis distance and tested by ADONIS (analysis of variance using distance matrices), ANOSIM (analysis of similarity), and MRPP (multi-response permutation procedure analysis) using "vegan 2.5-7" package (Oksanen et al, 2007). Structural equation model (SEM) was conducted using

“piecewiseSEM 2.1.2” package (Lefcheck, 2016) to quantify the effects of environmental variables on  $\beta$ -diversity of bacterial communities in sediment and water, as well as the biological and physicochemical relationships between sediment and water. All the analyses were conducted in R 4.0.4 (R Core Team, 2017).

## Results

### *Bacterial communities in sediment and water*

After quality filtering and the removal of chimeric sequences, 1,282,940 high-quality sequences were acquired and clustered into 27,889 OTUs at 97% nucleotide similarity level in sediment and water of the studied thermokarst lakes. In total, 17178 OTUs were detected in sediment and 17455 OTUs were detected in water. For the assigned OTUs in sediment, Proteobacteria (30%), Bacteroidetes (29%), Firmicutes (28%), and Actinobacteria (6%) were the dominant phyla (with an average relative abundance >5%, Figure 2a). In water bacterial communities, Proteobacteria (40%), Bacteroidetes (30%), Actinobacteria (11%), and Acidobacteria (5%) were the dominant phyla (Figure 2a). In terms of the top 10 most abundant phyla in these thermokarst lakes, sediment had significantly higher Firmicutes and Spirochaetes, while lower Acidobacteria, Actinobacteria, Fusobacteria, Nitrospirae, Patescibacteria, and Proteobacteria than water (Figure 2a). Moreover, bacterial  $\alpha$ -diversity was significantly lower in sediment than in water in terms of Chao 1, observed OTUs, and phylogenetic diversity (Figure 2b).

Venn diagram shown that sediment and water harbored a large amount of unique OTUs which were only presented in sediment (n=10434) or water (n=10711) while only 6744 OTUs were detected in both (Figure 3a). Substantial differences were observed between sediment and water bacterial communities based on the PCoA results (Figure 3b). These results were further confirmed by the results of adonis, ANOSIM, and MRPP analyses (Table S2). The sediment bacterial communities had a significantly higher  $\beta$ -diversity (Figure 3c) but lower niche width (Figure 3d) than water ones. The results indicate that the sediment and water environments harbored distinct bacterial communities in terms of taxonomic composition as well as  $\alpha$ - and  $\beta$ -diversity.

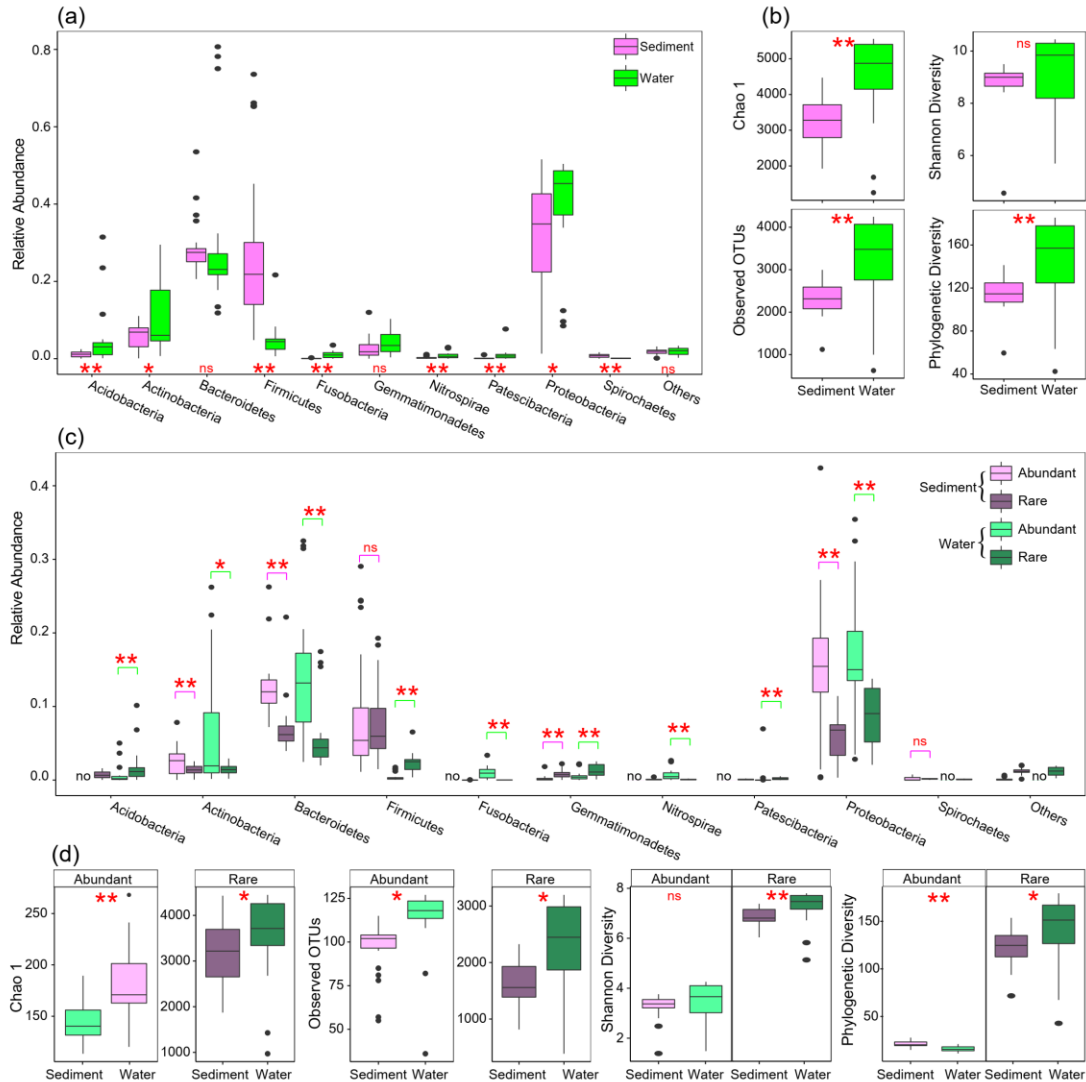

Figure 2 Bacterial community composition and alpha diver in sediment and water of the studied thermokarst lakes. (a) Differences in taxonomic composition of overall communities between sediment and water. (b) Differences in  $\alpha$ -diversity of overall communities between sediment and water. (c) Differences in taxonomic composition between abundant and rare subcommunities. (d) Differences in  $\alpha$ -diversity between abundant and rare subcommunities. The differences were assessed using Wilcoxon rank-sum test with “ns”, “\*”, and “\*\*” represent non-significance,  $P < 0.05$ , and  $P < 0.01$ , respectively.



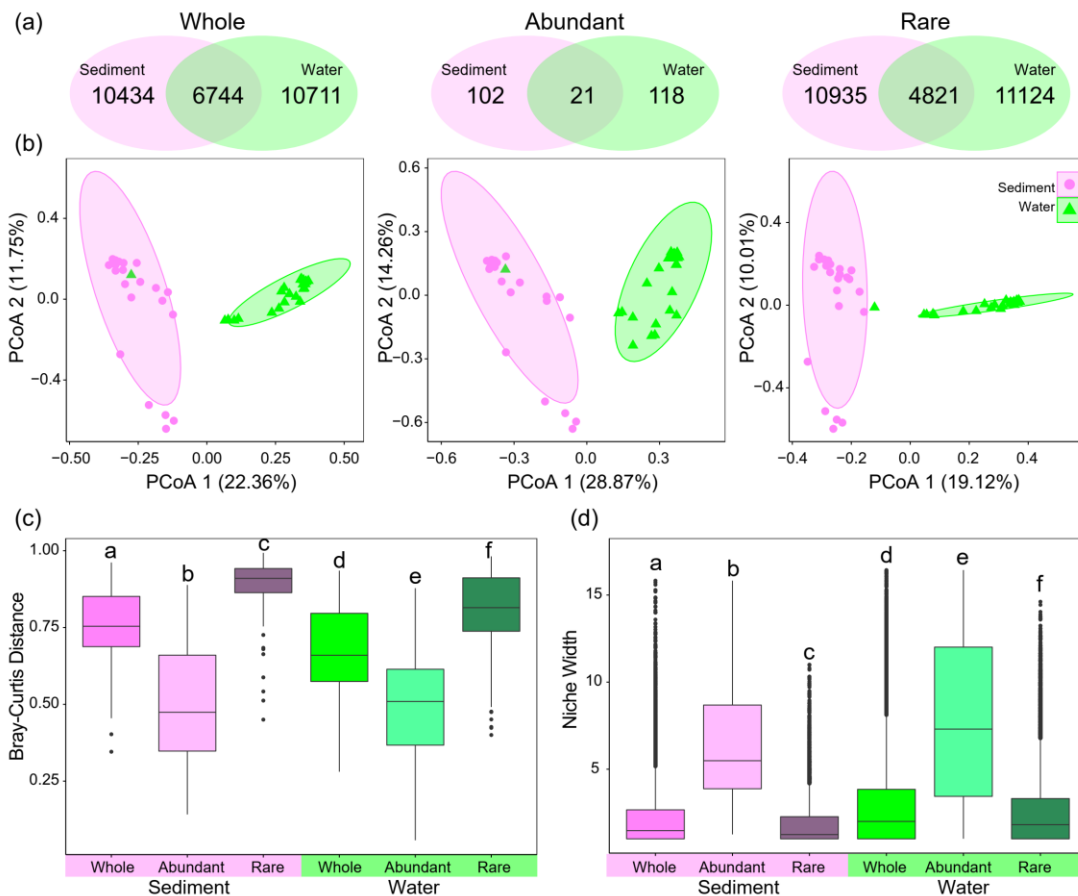

Figure 3 Structural differences of bacterial communities between sediment and water in terms of whole, abundant, and rare subcommunities. (a) Venn diagram showing the unique and shared OTUs in sediment and water. (b) Principal coordinates analysis (PCoA) based on Bray-Curtis distance using the relative abundance of OTUs. (c)  $\beta$ -diversity measured using Bray-Curtis distance. (d) Niche width of the OTUs. The different low-case letters in panels (c) and (d) represent significant difference assessed using ANOVA.

### ***Abundant and rare subcommunities in sediment and water***

In the whole bacterial communities, a large proportion of the OTUs were identified as rare taxa (69.6% for sediments and 69.8% for water in terms of the number of OTUs), but they only accounted for 25.1% and 22.3% of relative abundance in sediments and water (Figure S2), respectively. Conversely, a very small proportion of the OTUs were identified as abundant taxa (4.2% and 3.9% in both sediments and water, respectively), which account for 39.8% and 40.7% of the average relative abundance in each sample (Figure S2). Venn diagram shown that only 21 abundant OTUs and 4821 rare OTUs were abundant in both sediment and water environments (Figure 3a).

Abundant subcommunities were substantially different in taxonomic composition comparing with rare subcommunities in both sediment and water (Figure 2c). In sediment, abundant subcommunities had significantly higher Actinobacteria, Bacteroidetes,

Firmicutes, and Proteobacteria but lower Gemmatimonadetes than rare subcommunities (Figure 2c). In water, abundant subcommunities had higher Actinobacteria, Bacteroidetes, Fusobacteria, Nitrospirae, Patescibacteria, and Proteobacteria but lower Acidobacteria, Firmicutes, and Gemmatimonadetes than rare subcommunities (Figure 2c).

Moreover, abundant and rare subcommunities also had distinct structure between sediment and water (Figure 3b). When comparing abundant and rare subcommunities, abundant subcommunities had a significantly lower  $\beta$ -diversity (Bray-Curtis distance) but higher niche width than rare subcommunities in both sediment and water (Figure 3c, d). When comparing sediment and water, abundant subcommunities had lower  $\beta$ -diversity and niche width in sediment than in water, while rare subcommunities had higher  $\beta$ -diversity but lower niche width in sediment than in water (Figure 3c, d). The results indicate that, there were distinct distribution patterns and taxonomic composition between abundant and rare subcommunities in sediment and water.

### ***Turnover and nestedness***

Based on beta-partitioning, the Sorensen dissimilarity ( $\beta_{\text{sor}}$ , a  $\beta$ -diversity metric that measures compositional differences between sites) was partitioned to turnover component ( $\beta_{\text{turn}}$ ) and nestedness-resultant fraction ( $\beta_{\text{nest}}$ ) (Figure 4a). The estimated  $\beta_{\text{sor}}$  of the whole bacterial communities was  $0.733 \pm 0.1$ ,  $0.827 \pm 0.04$ , and  $0.638 \pm 0.14$  for paired sites in terms of only sediment samples, between sediment and water samples, and only water samples, respectively (Figure 4a). The estimated  $\beta_{\text{sor}}$  of abundant subcommunities was  $0.273 \pm 0.1$ ,  $0.365 \pm 0.08$ , and  $0.198 \pm 0.11$  for paired sites in terms of only sediment samples, between sediment and water samples, and only water samples, respectively (Figure 4a). The estimated  $\beta_{\text{sor}}$  of rare subcommunities was  $0.786 \pm 0.09$ ,  $0.871 \pm 0.04$ , and  $0.691 \pm 0.14$  for paired sites in terms of only sediment samples, between sediment and water samples, and only water samples, respectively (Figure 4a). Abundant subcommunities had a significantly lower  $\beta_{\text{sor}}$  than rare subcommunities (Figure 4a). Sediment communities had a significantly higher  $\beta_{\text{sor}}$  than water communities (Figure 4a).

Moreover, the estimated  $\beta_{\text{sor}}$  of bacterial communities was mainly contributed by turnover component with an average  $\beta_{\text{turn}}/\beta_{\text{sor}}$  ratio of 0.925 for the whole communities (Figure 4b). Abundant subcommunities had a significantly lower contribution of  $\beta_{\text{turn}}$  to  $\beta_{\text{sor}}$  ( $\beta_{\text{turn}}/\beta_{\text{sor}}$  ratio of 0.746) than that of rare subcommunities ( $\beta_{\text{turn}}/\beta_{\text{sor}}$  ratio of 0.942) (Figure 4b and Figure S3). Comparing different habitats, sediment had a significantly higher  $\beta_{\text{turn}}/\beta_{\text{sor}}$  ratio than water (Figure 4b and Figure S3).

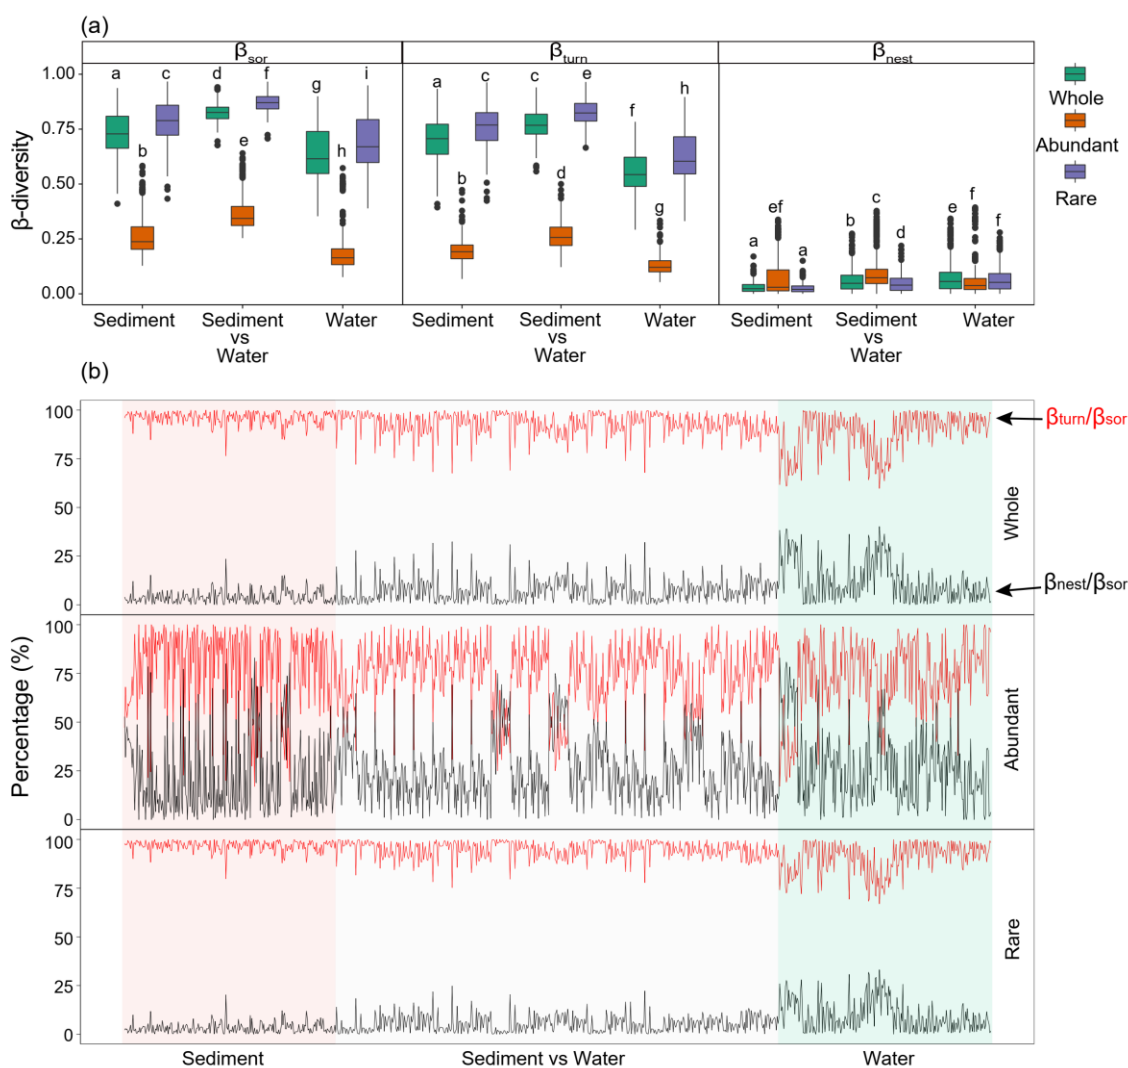

Figure 4 Beta-diversity partitioning results between pairs of sites in terms of only sediment samples, between sediment and water samples (sediment vs water), and only water samples. (a) Differences in total  $\beta$ -diversity calculated as the Sorensen dissimilarity ( $\beta_{sor}$ ), turnover component ( $\beta_{turn}$ ), and nestedness-resultant fraction ( $\beta_{nest}$ ) between the whole, abundant, and rare assemblages. The different low-case letters represent significant difference assessed using ANOVA. (b) The contributions of turnover component to total Sorensen dissimilarity ( $\beta_{turn}/\beta_{sor}$  ratio) and of nestedness-resultant fraction to total Sorensen dissimilarity ( $\beta_{nest}/\beta_{sor}$  ratio) for paired sites.

### *Environmental responses of abundant and rare subcommunities in sediment and water*

The results of SEM revealed the relationships between the variations of environmental variables and the variations of bacterial communities, as well as the relationships between sediment and water (Figure 5). Based on the SEM results, sediment and water had close associations in conductivity and total phosphorus (Figure 5). In addition, sediment and water had close associations in terms of the  $\beta$ -diversity of the whole bacterial communities

as well as the abundant subcommunities (Figure 5). In sediment, pH and TP had positive effects on the  $\beta$ -diversity of the whole communities, TP had positive effects on  $\beta$ -diversity of the abundant subcommunities, and pH had positive effects on  $\beta$ -diversity of the rare subcommunities (Figure 5). In water, however, conductivity had negative effects, and TN and TP had positive effects on the  $\beta$ -diversity of the whole communities as well as the abundant and rare subcommunities (Figure 5).

For different components of  $\beta$ -diversity, pH and TP had positive effects on  $\beta_{\text{turn}}$  of the whole communities and rare subcommunities in sediment (Figure 6). In water, however, environmental variables had more significant effects (Figure 6). For the whole water bacterial communities, TP had positive effects on  $\beta_{\text{turn}}$ , conductivity had negative while TN and TP had positive effects on  $\beta_{\text{nest}}$  (Figure 6). For the abundant subcommunities in water, TN and TP had positive effects on  $\beta_{\text{turn}}$ , conductivity and pH had negative while TN and TP had positive effects on  $\beta_{\text{nest}}$  (Figure 6). For the rare subcommunities in water, TN and TP had positive effects on  $\beta_{\text{turn}}$ , conductivity had negative while TN had positive effects on  $\beta_{\text{nest}}$  (Figure 6).

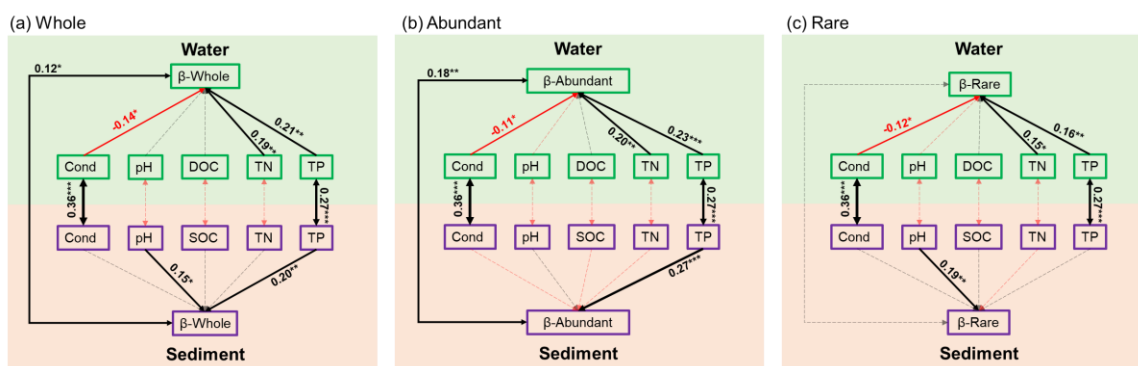

Figure 5 Structural equation model illustrating the relationships between the variation of environmental variables and the  $\beta$ -diversity of bacterial communities in sediment and water in terms of (a) whole community, (b) abundant subcommunities, and (c) rare subcommunities. Solid and dashed arrows represent the significant and nonsignificant relationships, respectively. Red and black arrows represent negative and positive relationships, respectively. The significant path coefficients were shown adjacent to the path with \*, \*\*, and \*\*\* denote the significant level of  $p < 0.05$ ,  $p < 0.01$ , and  $p < 0.001$ , respectively.

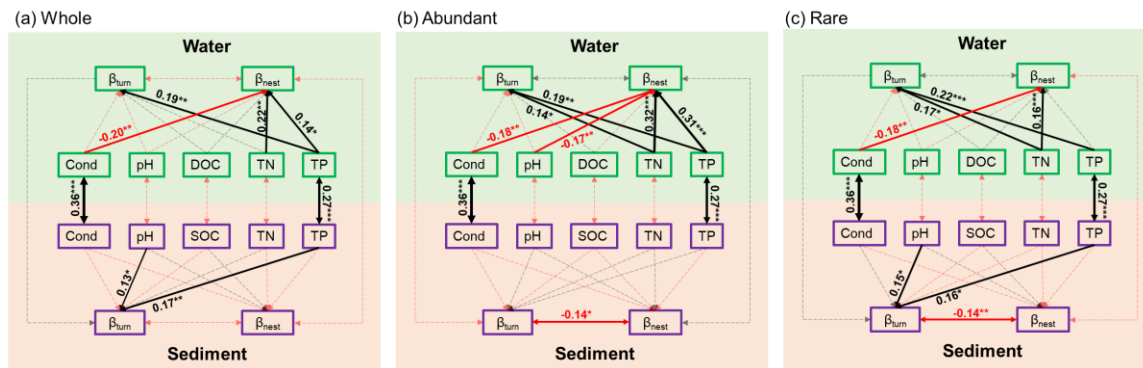

Figure 6 Structural equation model illustrating the relationships between the variation of environmental variables and different components of  $\beta$ -diversity (turnover component,  $\beta_{turn}$  and nestedness-resultant fraction,  $\beta_{nest}$ ) in sediment and water in terms of (a) whole community, (b) abundant subcommunities, and (c) rare subcommunities. Solid and dashed arrows represent the significant and nonsignificant relationships, respectively. Red and black arrows represent negative and positive relationships, respectively. The significant path coefficients were shown adjacent to the path with \*, \*\*, and \*\*\* denote the significant level of  $p < 0.05$ ,  $p < 0.01$ , and  $p < 0.001$ , respectively.

## Discussion

### *Differences and linkages between sediment and water*

This study showed that the whole bacterial communities as well as the abundant and rare subcommunities differed substantially between sediment and water, in terms of taxonomical composition,  $\alpha$ -diversity, and  $\beta$ -diversity. It is unequivocal that different habitats usually harbor distinct microbial assemblages (Fierer et al, 2012; Hugerth et al, 2015; Louca et al, 2016). Previous studies have demonstrated that, in lake ecosystems, sediment and water host different bacterial communities (Gough and Stahl, 2011; Yang et al, 2016; Ren et al, 2019). In our study, eight out of the ten most abundant phylum presented significantly different relative abundance between sediment and water (Figure 2a). Specifically, Firmicutes had a mean relative abundance of 28% in sediment but only 5% in water and overwhelming majority of the Firmicutes OTUs were affiliated to Clostridia class, which are anaerobic and always dominate the bacterial communities during decomposition process in lake sediments (Xing et al, 2011; Zhao et al, 2017). In general, sediments always have high species-level diversity than water, especially in temperature lakes (Lozupone and Knight, 2007; Ren et al, 2019). In our study, however, sediment had significantly lower  $\alpha$ -diversity indexes than water (Figure 2b) suggesting that the water column provides more niches for bacterial taxa than sediment. This was further supported by that the bacterial taxa had higher niche widths in water than in sediment (Figure 3d).

In addition, taxonomic composition,  $\alpha$ -diversity, and  $\beta$ -diversity also differed substantially between abundant and rare subcommunities. Abundant and rare taxa may have distinct intrinsic characteristics and life strategies to survive in challenging environments (Logares

et al, 2014; Malik et al, 2020). In bacterial communities, abundant taxa play as the core species with high growth rates and enormous contributions to most ecosystem functions (Pedros-Alio, 2006). On the contrary, rare taxa encompass ecologically redundant taxa that have low growth rates and competition capability, maintain community stability because of high redundancy, and contribute to community dissimilarity because of broad diversity (Pedros-Alio, 2012). There is no doubt that the abundant taxa had significantly higher relative abundances but lower  $\alpha$ -diversity than rare taxa (Figure 2). In our studied bacterial communities, only 4% OTUs were abundant taxa which accounted for 40% of sequences, while more than 70% OTUs were rare taxa which only account for 24% of sequences (Figure S2). Moreover, in line with previous studies in many other ecosystems (Wu et al, 2016; Ren et al, 2020; Shu et al, 2021), abundant taxa had significantly lower  $\beta$ -diversity and occupy higher niche width than rare taxa (Figure 3), suggesting that abundant taxa were more ubiquitous distributed and more competitive for limited resources than rare taxa during the adaptation process (Malik et al, 2020).

In aquatic ecosystems, bacterial communities are controlled differently by various factors and processes in different environments (Gasol et al, 2002; Simek et al, 2008; Ren et al, 2019). To understand the factors that control bacterial community variations is a central theme in ecology (Fierer and Jackson, 2006; Pla-Rabes et al, 2011). In our study, the variations of bacterial communities had close relationships with pH and TP in sediment while with conductivity, TN, and TP in water (Figure 5). Moreover, the abundant and rare subcommunities respond different to environmental variables in sediment that abundant subcommunities only had a close relationship with TP while rare subcommunities only had a close relationships with pH (Figure 5). The availabilities of key nutrients (N and P) have long been demonstrated to be essential in structuring bacterial communities (Torsvik et al, 2002; Lee et al, 2017). Nutrient dynamics usually have close interactions with bacterial communities in water and sediment in lake ecosystems (Lee et al, 2017; Ren et al, 2019). The different responses of microorganisms to nutrients root in their metabolic features and ecological strategies, as well as environmental properties (Carbonero et al, 2014). Salinity is always the major environmental determinant of microbial community in aquatic environments (Lozupone and Knight, 2007). In thermokarst lakes, sediment was formed from permafrost soil. Many studies have demonstrated that soil bacterial communities are strongly affected by pH (Fierer et al, 2012; Ren et al, 2021).

In addition to the differences, sediment and water also had close biological and physicochemical relationships (Roeske et al, 2012; Parker et al, 2016). In our study, sediment and water were closely related in conductivity and TP (Figure 5). Moreover, the  $\beta$ -diversity, especially the  $\beta$ -diversity of abundant subcommunities, also had a significant relationship between sediment and water (Figure 5). These connections between sediment and water might be the results of thermokarst lakes formation and evolution processes, during which, nutrients and other elements are continuously released to water from

permafrost and sediment (Mackelprang et al, 2017; In'T Zandt et al, 2020; Manasypov et al, 2021).

### ***Beta diversity and its different components***

Unravelling the underlying mechanisms driving species distribution patterns is a vital issue in ecology and biogeography (Podani and Schmera, 2016). As a key term for assessing spatial and temporal variations of microbial assembly,  $\beta$ -diversity can be decomposed into two distinct components: turnover and nestedness (Podani and Schmera, 2016), which may reflect the relative importance of different underlying mechanisms in structuring communities varies with the spatiotemporal scales (Podani and Schmera, 2016; Viana et al, 2016). In our study, bacterial communities are predominantly governed by strong turnover processes ( $\beta_{\text{turn}}/\beta_{\text{sor}}$  ratio of 0.925 for the whole communities). However, abundant subcommunities were significantly lower in  $\beta_{\text{turn}}/\beta_{\text{sor}}$  ratio compared to rare subcommunities (Figure 4b and Figure S3). Moreover, bacterial communities in sediment had a significantly higher  $\beta_{\text{turn}}/\beta_{\text{sor}}$  ratio than in water (Figure 4b and Figure S3). Species turnover refers to the fact that species experiencing replacement of each other (gains and losses) along ecological gradients as a consequence of spatiotemporal constraints and/or environmental sorting (Leprieur et al, 2011). Therefore, we could expect that regions have high species turnover would also possess great heterogeneities in contemporary environmental conditions and/or strong geographical isolation caused by dispersal barriers (Gaston et al, 2007a, 2007b). In our studied thermokarst lakes, the environmental factors had high variations in both sediment and water (Table S1). However, sediment is more isolated than water between lakes, even for the intimate neighbors in the space. Thus, it is expected that sediment had higher  $\beta_{\text{turn}}/\beta_{\text{sor}}$  ratio than water. Moreover, the ecological tolerance and niche breadth of taxa are also determinative factors for turnover rate (Leprieur et al, 2011), which is the potential reason that abundant taxa had lower  $\beta_{\text{turn}}/\beta_{\text{sor}}$  ratio than rare taxa because of higher niche width and ecological tolerance of abundant taxa. In contrast to turnover, nestedness implies another pattern of richness difference that the species at a depauperate site is a subset of assemblages of a species-rich site (Leprieur et al, 2011; Baselga, 2012). The nestedness richness difference (species loss or gain) may result from various ecological processes, such as nestedness of habitats, selective colonization and/or extinction, as well as interspecific variation of environmental tolerance (Whittaker and Fernandez-Palacios, 2007; Baselga, 2010). All in all, our results suggest that the driving mechanisms for the variation of bacterial assemblages are differed in term of different habitats or relative abundances of taxa. The bacterial communities of thermokarst lakes, especially rare subcommunities or particularly in sediment, might be strongly structured by environmental filtering and geographical isolation which potentially driving these assemblages tend to be more compositionally distinct.

Integrating the differences in taxonomic composition and  $\beta$ -diversity patterns of bacterial communities in sediment and water in terms of the whole, abundant, and rare

communities/sub-communities, we can propose a hypothesis that the bacterial communities in water and sediment are initially originated from the same source (permafrost) and then diverged into two distinct communities due to the environmental divergence as well as the different assemblage rules in constructing communities. The further study of the bacterial community divergence during the thermokarst lakes formation and evolution processes would promote our understanding of the ecological consequences of future climate change.

## **Conclusions**

Thermokarst lakes are among the world's most pristine aquatic ecosystems and extremely vulnerable to accelerating climate change. Assessing the community composition and spatial pattern, as well as their underlying driving mechanisms in sediment and water is pivotal in understanding the heterogeneous and fast changing thermokarst lake ecosystems. This study highlights the differences and linkages of sediment and water in terms of physicochemical properties, taxonomical composition, and diversity patterns. Moreover, the underlying mechanisms driving taxa distributions patterns were also be revealed. There were distinct  $\beta$ -diversity patterns existed between abundant and rare subcommunities as well as between sediment and water. This integral study of bacterial communities can enhance our understanding of the community assembly rules and ecosystem structures and processes of the thermokarst lakes.

## **Conflict of Interest Statement**

The authors declare no competing interests.

## **Funding**

This study was supported by the start-up funding for the new introduced talents of the Beijing Normal University.

## **Acknowledgements**

We are grateful to the anonymous reviewers for the comments, to the Administration Office of Sanjiangyuan National Park for the assistances in the field work.



## Supplementary Information

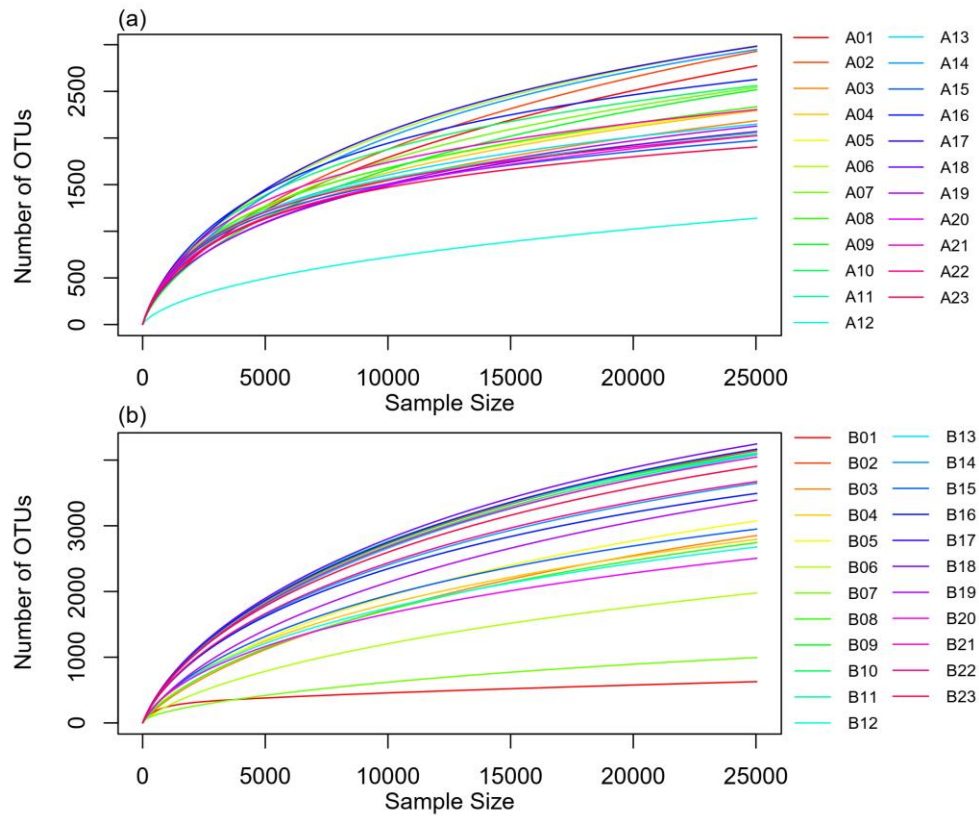

Figure S1 Rarefaction curve of operational taxonomic units (OTUs) in each sample site at 97% nucleotide sequence identity threshold. (a) sediment samples. (b) water samples.

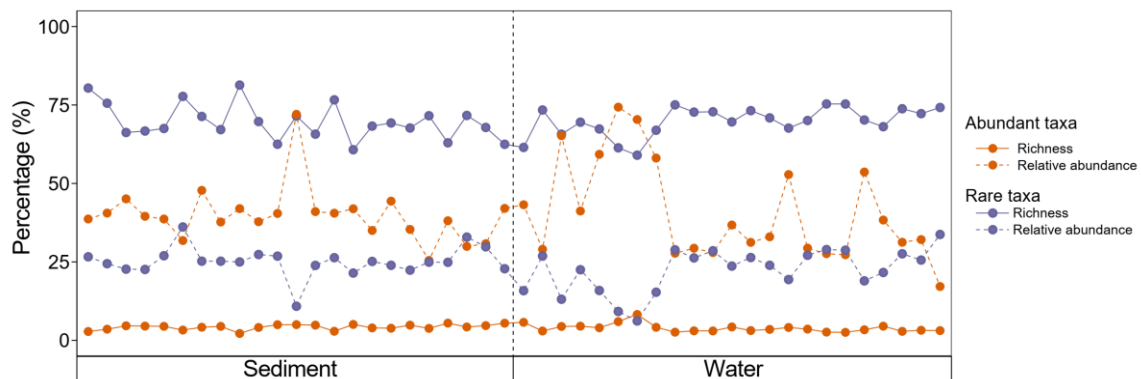

Figure S2 The proportion of the richness and relative abundance of OTUs in abundant and rare subcommunities compared to the whole bacterial communities in each sample.

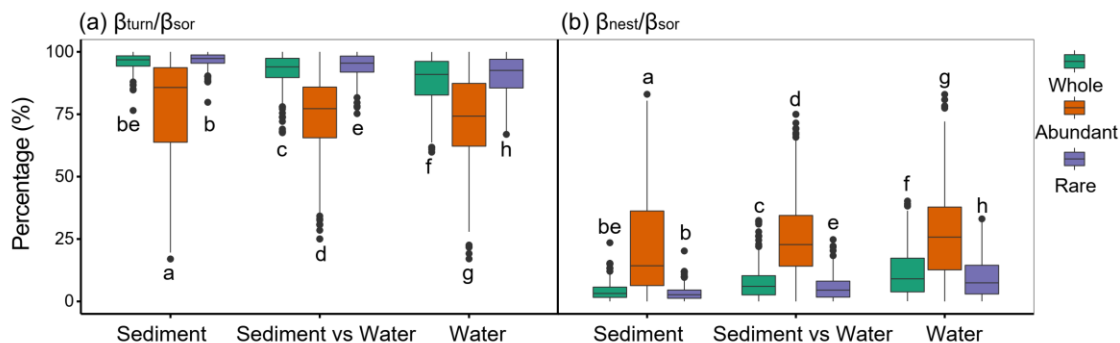

Figure S3 The comparison of beta-partitioning ratios between whole, abundant, and rare taxa for paired sites of only sediment samples, between sediment and water samples, and only water samples, respectively. (a) Contribution of turnover component ( $\beta_{turn}$ ) to total  $\beta$ -diversity calculated as the Sorensen dissimilarity ( $\beta_{sor}$ ). (b) Contribution of nestedness-resultant fraction ( $\beta_{nest}$ ) to total  $\beta$ -diversity calculated as the Sorensen dissimilarity ( $\beta_{sor}$ ). The different low-case letters represent significant differences of the mean values using ANOVA.

Table S1 The basic physicochemical properties of sediment and water samples.

|                      | Minimum | Maximum | Mean   | Standard Deviation | Coefficient Variation (%) |
|----------------------|---------|---------|--------|--------------------|---------------------------|
| <b>Sediment</b>      |         |         |        |                    |                           |
| pH                   | 8.835   | 9.835   | 9.354  | 0.246              | 2.631                     |
| Conductivity (us/cm) | 204     | 1857    | 513    | 382                | 74                        |
| SOC (g/kg)           | 4.672   | 47.236  | 14.620 | 10.367             | 70.906                    |
| TN (g/kg)            | 0.280   | 2.550   | 1.092  | 0.645              | 59.045                    |
| TP (g/kg)            | 0.151   | 0.562   | 0.372  | 0.085              | 22.852                    |
| <b>Water</b>         |         |         |        |                    |                           |
| pH                   | 7.580   | 9.670   | 8.803  | 0.515              | 5.856                     |
| Conductivity (us/cm) | 312     | 4849    | 1732   | 1416               | 82                        |
| DOC (mg/L)           | 1.590   | 43.850  | 16.477 | 10.438             | 63.347                    |
| TN (mg/L)            | 0.181   | 1.099   | 0.607  | 0.214              | 35.260                    |
| TP (mg/L)            | 0.039   | 0.162   | 0.100  | 0.028              | 27.871                    |

Table S2 The differences between bacterial communities in sediment and water tested by analyses of Adonis, Anosim, and MRPP.

| Bacterial communities | Adonis         |   | Anosim |   | MRPP     |   |
|-----------------------|----------------|---|--------|---|----------|---|
|                       | R <sup>2</sup> | P | R      | P | $\delta$ | P |

|                       |       |       |       |       |       |       |
|-----------------------|-------|-------|-------|-------|-------|-------|
| Whole community       | 0.192 | 0.001 | 0.662 | 0.001 | 0.847 | 0.001 |
| Abundant subcommunity | 0.241 | 0.001 | 0.661 | 0.001 | 0.805 | 0.001 |
| Rare subcommunity     | 0.172 | 0.001 | 0.73  | 0.001 | 0.889 | 0.001 |

## References

- Baselga A. 2010. Partitioning the turnover and nestedness components of beta diversity. *Global Ecology and Biogeography*, 19: 134-143.
- Baselga A. 2012. The relationship between species replacement, dissimilarity derived from nestedness, and nestedness: Species replacement and nestedness. *Global Ecology and Biogeography*, 21: 1223-1232.
- Baselga A, Orme CDL. 2012. betapart: an R package for the study of beta diversity. *Methods in Ecology and Evolution*, 3: 808-812.
- Biskaborn BK, Smith SL, Noetzli J, Matthes H, Vieira G, Streletskiy DA, Schoeneich P, Romanovsky VE, Lewkowicz AG, Abramov A, Allard M, Boike J, Cable WL, Christiansen HH, Delaloye R, Diekmann B, Drozdov D, Etzelmuller B, Grosse G, Guglielmin M, Ingeman-Nielsen T, Isaksen K, Ishikawa M, Johannsson M, Johannsson H, Joo A, Kaverin D, Kholodov A, Konstantinov P, Kroger T, Lambiel C, Lanckman JP, Luo D, Malkova G, Meiklejohn I, Moskalenko N, Oliva M, Phillips M, Ramos M, Sannel A, Sergeev D, Seybold C, Skryabin P, Vasiliev A, Wu Q, Yoshikawa K, Zheleznyak M, Lantuit H. 2019. Permafrost is warming at a global scale. *Nature Communications*, 10: 264.
- Bolger AM, Lohse M, Usadel B. 2014. Trimmomatic: a flexible trimmer for Illumina sequence data. *Bioinformatics*, 30: 2114-2120.
- Bowden WB. 2010. Climate change in the Arctic-permafrost, thermokarst, and why they matter to the non-Arctic world. *Geography Compass*, 4: 1553-1566.
- Campbell BJ, Yu L, Heidelberg JF, Kirchman DL. 2011. Activity of abundant and rare bacteria in a coastal ocean. *Proceedings of the National Academy of Sciences*, 108: 12776-12781.
- Caporaso JG, Kuczynski J, Stombaugh J, Bittinger K, Bushman FD, Costello EK, Fierer N, Pena AG, Goodrich JK, Gordon JI, Huttley GA, Kelley ST, Knights D, Koenig JE, Ley RE, Lozupone CA, McDonald D, Muegge BD, Pirrung M, Reeder J, Sevinsky JR, Tumbaugh PJ, Walters WA, Widmann J, Yatsunenko T, Zaneveld J, Knight R. 2010. QIIME allows analysis of high-throughput community sequencing data. *Nature Methods*, 7: 335-336.
- Carbonero F, Oakley BB, Purdy KJ. 2014. Metabolic flexibility as a major predictor of spatial distribution in microbial communities. *Plos One*, 9: e85105.
- Carter JL, Topping BR, Kuwabara JS, Balistrieri LS, Woods PF, Berelson WM, Fend SV. 2003. Importance of sediment-water interactions in Coeur d'Alene Lake, Idaho: Management Implications. *Environmental Management*, 32: 348-359.
- Chin KS, Lento J, Culp JM, Lacelle D, Kokelj SV. 2016. Permafrost thaw and intense thermokarst activity decreases abundance of stream benthic macroinvertebrates. *Global Change Biology*, 22: 2715-2728.
- de Jong A, In TZM, Meisel OH, Jetten M, Dean JF, Rasigraf O, Welte CU. 2018. Increases in temperature and nutrient availability positively affect methane-cycling microorganisms in Arctic thermokarst lake sediments. *Environmental Microbiology*, 20: 4314-4327.
- Debroas D, Hugoni M, Domaizon I. 2015. Evidence for an active rare biosphere within freshwater protists community. *Molecular Ecology*, 24: 1236-1247.
- Farquharson LM, Mann DH, Grosse G, Jones BM, Romanovsky VE. 2016. Spatial distribution of thermokarst terrain in Arctic Alaska. *Geomorphology*, 273: 116-133.
- Fierer N, Jackson RB. 2006. The diversity and biogeography of soil bacterial communities. *Proceedings of the National Academy of Sciences*, 103: 626-631.

- Fierer N, Leff JW, Adams BJ, Nielsen UN, Bates ST, Lauber CL, Owens S, Gilbert JA, Wall DH, Caporaso JG. 2012. Cross-biome metagenomic analyses of soil microbial communities and their functional attributes. *Proceedings of the National Academy of Sciences*, 109: 21390-21395.
- Gasol JM, Comerma M, Garcia JC, Armengol J, Casamayor EO, Kojecka P, Simek K. 2002. A transplant experiment to identify the factors controlling bacterial abundance, activity, production, and community composition in a eutrophic canyon-shaped reservoir. *Limnology and Oceanography*, 47: 62-77.
- Gaston KJ, Davies RG, Orme CD, Olson VA, Thomas GH, Ding TS, Rasmussen PC, Lennon JJ, Bennett PM, Owens IP, Blackburn TM. 2007a. Spatial turnover in the global avifauna. *Proceedings of the Royal Society B: Biological Sciences*, 274: 1567-1574.
- Gaston KJ, Evans K, Lennon J. 2007b. The scaling of spatial turnover: pruning the thicket. In: *Scaling Biodiversity* (eds Storch, D., Marquet, P.M., and Brown, J.H.). Cambridge University Press, Cambridge, UK.
- Gough HL, Stahl DA. 2011. Microbial community structures in anoxic freshwater lake sediment along a metal contamination gradient. *The ISME Journal*, 5: 543-558.
- Graham DE, Wallenstein MD, Vishnivetskaya TA, Waldrop MP, Phelps TJ, Pfiffner SM, Onstott TC, Whyte LG, Rivkina EM, Gilichinsky DA, Elias DA, Mackelprang R, Verberkmoes NC, Hettich RL, Wagner D, Wullschleger SD, Jansson JK. 2012. Microbes in thawing permafrost: the unknown variable in the climate change equation. *The ISME Journal*, 6: 709-712.
- Hugerth LW, Larsson J, Alneberg J, Lindh MV, Legrand C, Pinhassi J, Andersson AF. 2015. Metagenome-assembled genomes uncover a global brackish microbiome. *Genome Biology*, 16: 279.
- In'T Zandt MH, Liebner S, Welte CU. 2020. Roles of thermokarst lakes in a warming world. *Trends in Microbiology*, 28: 769-779.
- Jiao S, Lu Y. 2019. Soil pH and temperature regulate assembly processes of abundant and rare bacterial communities in agricultural ecosystems. *Environmental Microbiology*, 22: 1052-1065.
- Karlsson JM, Lyon SW, Destouni G. 2012. Thermokarst lake, hydrological flow and water balance indicators of permafrost change in Western Siberia. *Journal of Hydrology*, 464-465: 459-466.
- Kokelj SV, Jorgenson MT. 2013. Advances in thermokarst research. *Permafrost and Periglacial Processes*, 24: 108-119.
- Lee ZMP, Poret-Peterson AT, Siefert JL, Kaul D, Moustafa A, Allen AE, Dupont CL, Eguiarte LE, Souza V, Elser JJ. 2017. Nutrient stoichiometry shapes microbial community structure in an evaporitic shallow pond. *Frontiers in Microbiology*, 8: 949.
- Lefcheck JS. 2016. piecewiseSEM: Piecewise structural equation modelling in r for ecology, evolution, and systematics. *Methods in Ecology and Evolution*, 7: 573-579.
- Legendre P. 2014. Interpreting the replacement and richness difference components of beta diversity. *Global Ecology and Biogeography*, 23: 1324-1334.
- Leprieux F, Tedesco PA, Huguény B, Beauchard O, Durr HH, Brosse S, Oberdorff T. 2011. Partitioning global patterns of freshwater fish beta diversity reveals contrasting signatures of past climate changes. *Ecology Letters*, 14: 325-334.
- Liu L, Yang J, Yu Z, Wilkinson DM. 2015. The biogeography of abundant and rare bacterioplankton in the lakes and reservoirs of China. *The ISME Journal*, 9: 2068-2077.
- Logares R, Audic S, Bass D, Bittner L, Boute C, Christen R, Claverie JM, Decelle J, Dolan JR, Dunthorn M, Edvardsen B, Gobet A, Kooistra WH, Mahe F, Not F, Ogata H, Pawlowski J, Pernice MC, Romac S, Shalchian-Tabrizi K, Simon N, Stoeck T, Santini S, Siano R, Wincker P, Zingone A, Richards TA, de Vargas C, Massana R. 2014. Patterns of rare and abundant marine microbial eukaryotes. *Current Biology*, 24: 813-821.
- Louca S, Parfrey LW, Doebeli M. 2016. Decoupling function and taxonomy in the global ocean microbiome. *Science*, 353: 1272-1277.
- Lozupone CA, Knight R. 2007. Global patterns in bacterial diversity. *Proceedings of the National Academy of Sciences*, 104: 11436-11440.
- Luo J, Niu F, Lin Z, Liu M, Yin G. 2015. Thermokarst lake changes between 1969 and 2010 in the Beilu River Basin, Qinghai-Tibet Plateau, China. *Science Bulletin*, 60: 556-564.

- Lynch MD, Neufeld JD. 2015. Ecology and exploration of the rare biosphere. *Nature Reviews Microbiology*, 13: 217.
- Mackelprang R, Burkert A, Haw M, Mahendrarajah T, Conaway CH, Douglas TA, Waldrop MP. 2017. Microbial survival strategies in ancient permafrost: insights from metagenomics. *The ISME Journal*, 11: 2305-2318.
- Malik AA, Martiny JBH, Brodie EL, Martiny AC, Treseder KK, Allison SD. 2020. Defining trait-based microbial strategies with consequences for soil carbon cycling under climate change. *The ISME Journal*, 14: 1-9.
- Manasypov RM, Pokrovsky OS, Shirokova LS, Auda Y, Zinner NS, Vorobyev SN, Kirpotin SN. 2021. Biogeochemistry of macrophytes, sediments and porewaters in thermokarst lakes of permafrost peatlands, western Siberia. *Science of the Total Environment*, 763: 144201.
- Nossa CW, Oberdorf WE, Yang L, Aas JA, Paster BJ, Desantis TZ, Brodie EL, Malamud D, Poles MA, Pei Z. 2010. Design of 16S rRNA gene primers for 454 pyrosequencing of the human foregut microbiome. *World Journal of Gastroenterology*, 16: 4135-4144.
- Oksanen J, Kindt R, Legendre PO, Hara B, Stevens MHH, Oksanen MJ, Suggests MASS. 2007. The vegan package. *Community Ecology Package*, 10: 631-637.
- Parker SR, West RF, Boyd ES, Feyhl-Buska J, Gammons CH, Johnston TB, Williams GP, Poulson SR. 2016. Biogeochemical and microbial seasonal dynamics between water column and sediment processes in a productive mountain lake: Georgetown Lake, MT, USA. *Journal of Geophysical Research-Biogeosciences*, 121: 2064-2081.
- Pastick NJ, Jorgenson MT, Goetz SJ, Jones BM, Wylie BK, Minsley BJ, Genet H, Knight JF, Swanson DK, Jorgenson JC. 2019. Spatiotemporal remote sensing of ecosystem change and causation across Alaska. *Global Change Biology*, 25: 1171-1189.
- Pedros-Alio C. 2006. Marine microbial diversity: can it be determined? *Trends in Microbiology*, 14: 257-263.
- Pedros-Alio C. 2012. The rare bacterial biosphere. *Annual Review of Marine Science*, 4: 449-466.
- Pla-Rabes S, Flower RJ, Shilland EM, Kreiser AM. 2011. Assessing microbial diversity using recent lake sediments and estimations of spatio-temporal diversity. *Journal of Biogeography*, 38: 2033-2040.
- Podani J, Schmera D. 2016. Once again on the components of pairwise beta diversity. *Ecological Informatics*, 32: 63-68.
- Polishchuk Y, Bogdanov A, Polishchuk V, Manasypov R, Shirokova L, Kirpotin S, Pokrovsky O. 2017. Size distribution, surface coverage, water, carbon, and metal storage of thermokarst lakes in the permafrost zone of the Western Siberia lowland. *Water*, 9: 228.
- Qiu G, Cheng G. 1995. Permafrost in China: past and present. *Permafrost and Periglacial Processes*, 6: 3-14.
- Quast C, Pruesse E, Yilmaz P, Gerken J, Schweer T, Yarza P, Peplies J, Glockner FO. 2013. The SILVA ribosomal RNA gene database project: improved data processing and web-based tools. *Nucleic Acids Research*, 41: 590-596.
- R Core Team. 2017. R: A language and environment for statistical computing, R Foundation for Statistical Computing, Vienna, Austria. <https://www.R-project.org>.
- Ren Z, Niu DC, Ma PP, Wang Y, Wang ZM, Fu H, Elser JJ. 2020. Bacterial communities in stream biofilms in a degrading grassland watershed on the Qinghai-Tibet Plateau. *Frontiers in Microbiology*, 11: e1021.
- Ren Z, Qu XD, Peng WQ, Yu Y, Zhang M. 2019. Nutrients drive the structures of bacterial communities in sediments and surface waters in the river-lake system of Poyang Lake. *Water*, 11: e930.
- Ren Z, Wang ZM, Wang Y, Ma PP, Niu DC, Fu H, Elser JJ. 2021. Soil bacterial communities vary with grassland degradation in the Qinghai Lake watershed. *Plant and Soil*, 460: 541-557.
- Reyes FR, Loughheed VL. 2015. Rapid nutrient release from permafrost thaw in arctic aquatic ecosystems. *Arctic, Antarctic, and Alpine Research*, 47: 35-48.
- Reyon D, Tsai SQ, Khayter C, Foden JA, Sander JD, Joung JK. 2012. FLASH assembly of TALENs for high-throughput genome editing. *Nature Biotechnology*, 30: 460-465.

- Roeske K, Sachse R, Scheerer C, Roeske I. 2012. Microbial diversity and composition of the sediment in the drinking water reservoir Saldenbach (Saxonia, Germany). *Systematic and Applied Microbiology*, 35: 35-44.
- Serikova S, Pokrovsky OS, Laudon H, Krickov IV, Lim AG, Manasypov RM, Karlsson J. 2019. High carbon emissions from thermokarst lakes of Western Siberia. *Nature Communications*, 10: 1552.
- Shirokova LS, Pokrovsky OS, Kirpotin SN, Desmukh C, Pokrovsky BG, Audry S, Viers J. 2013. Biogeochemistry of organic carbon, CO<sub>2</sub>, CH<sub>4</sub>, and trace elements in thermokarst water bodies in discontinuous permafrost zones of Western Siberia. *Biogeochemistry*, 113: 573-593.
- Shu D, Guo Y, Zhang B, Zhang C, Van Nostrand JD, Lin Y, Zhou J, Wei G. 2021. Rare prokaryotic sub-communities dominate the complexity of ecological networks and soil multinutrient cycling during long-term secondary succession in China's Loess Plateau. *Science of the Total Environment*, 774: 145737.
- Simek K, Hornak K, Jezbera J, Nedoma J, Znachor P, Hejzlar J, Sed'A J. 2008. Spatio-temporal patterns of bacterioplankton production and community composition related to phytoplankton composition and protistan bacterivory in a dam reservoir. *Aquatic Microbial Ecology*, 51: 249-262.
- Torsvik V, Ovreas L, Thingstad TF. 2002. Prokaryotic diversity - Magnitude, dynamics, and controlling factors. *Science*, 296: 1064-1066.
- Tranvik LJ. 1989. Bacterioplankton growth, grazing mortality and quantitative relationship to primary production in a humic and a clearwater lake. *Journal of Plankton Research*, 11: 985-1000.
- Viana DS, Figuerola J, Schwenk K, Manca M, Hobæk A, Mjelde M, Preston CD, Gornall RJ, Croft JM, King RA, Green AJ. 2016. Assembly mechanisms determining high species turnover in aquatic communities over regional and continental scales. *Ecography*, 39: 281-288.
- Vincent WF, Lemay M, Allard M, Wolfe BB. 2013. Adapting to permafrost change: A science framework. *Eos, Transactions American Geophysical Union*, 94: 373-375.
- Vucic JM, Gray DK, Cohen RS, Syed M, Murdoch AD, Sharma S. 2020. Changes in water quality related to permafrost thaw may significantly impact zooplankton in small Arctic lakes. *Ecological Applications*, 30: e02186.
- Walter KM, Zimov SA, Chanton JP, Verbyla D, Chapin FS. 2006. Methane bubbling from Siberian thaw lakes as a positive feedback to climate warming. *Nature*, 443: 71-75.
- Whittaker RJ, Fernandez-Palacios JM. 2007. *Island biogeography: ecology, evolution, and conservation*, 2nd edn. Oxford University Press, Oxford.
- Wu W, Logares R, Huang B, Hsieh CH. 2016. Abundant and rare picoeukaryotic sub-communities present contrasting patterns in the epipelagic waters of marginal seas in the northwestern Pacific Ocean. *Environmental Microbiology*, 19: 287-300.
- Xing P, Guo L, Tian W, Wu QL. 2011. Novel Clostridium populations involved in the anaerobic degradation of Microcystis blooms. *The ISME Journal*, 5: 792-800.
- Xue M, Guo Z, Gu X, Gao H, Weng S, Zhou J, Gu D, Lu H, Zhou X. 2020. Rare rather than abundant microbial communities drive the effects of long-term greenhouse cultivation on ecosystem functions in subtropical agricultural soils. *Science of the Total Environment*, 706: e136004.
- Xue Y, Chen H, Yang JR, Liu M, Huang B, Yang J. 2018. Distinct patterns and processes of abundant and rare eukaryotic plankton communities following a reservoir cyanobacterial bloom. *The ISME Journal*, 12: e2263.
- Yang J, Ma L, Jiang H, Wu G, Dong H. 2016. Salinity shapes microbial diversity and community structure in surface sediments of the Qinghai-Tibetan Lakes. *Scientific Reports*, 6: e25078.
- Zhang G, Yao T, Piao S, Bolch T, Xie H, Chen D, Gao Y, O'Reilly CM, Shum CK, Yang K, Yi S. 2017. Extensive and drastically different alpine lake changes on Asia's high plateaus during the past four decades. *Geophysical Research Letters*, 44: 252-260.
- Zhang T, Barry RG, Knowles K, Heginbottom JA, Brown J. 1999. Statistics and characteristics of permafrost and ground-ice distribution in the Northern Hemisphere. *Polar Geography*, 23: 132-154.
- Zhao D, Cao X, Huang R, Zeng J, Wu QL, Li M. 2017. Variation of bacterial communities in water and sediments during the decomposition of Microcystis biomass. *Plos One*, 12: e0176397.

Zou D, Zhao L, Sheng Y, Chen J, Hu G, Wu T, Wu J, Xie C, Wu X, Pang Q, Wang W, Du E, Li W, Liu G, Li J, Qin Y, Qiao Y, Wang Z, Shi J, Cheng G. 2017. A new map of permafrost distribution on the Tibetan Plateau. *Cryosphere*, 11: 2527-2542.
